# Supplementary material for: Synthesis of Poly(Lactic Acid-co-Glycolic Acid) Copolymers with High Glycolide Ratio by Ring-Opening Polymerisation
Source: MDPI journal article supplement (doi:10.3390/polym13152458), 2021-07-26
Supplement: s1 [file s1]

# Supplementary Information

## Supporting Figures and Tables

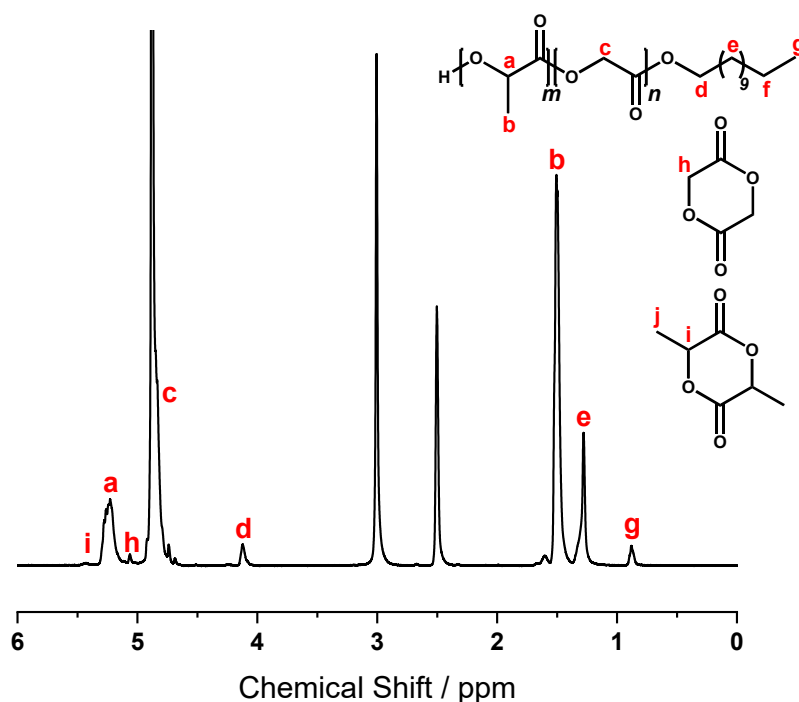

**Figure S1.** <sup>1</sup>H NMR spectrum of PLGA25 synthesised at 150 °C for 2.5 hours using an [M]:[C] = 6,500:1 and [M]:[I] = 30:1. Spectrum run in DMSO-*d*<sub>6</sub> at 80 °C and 400 MHz.

**Table S1.** Molecular Weight of PLGA25 synthesised at 150 °C for 2.5 hours using an [M]:[C] = 6,500:1 and [M]:[I] = 30:1. SEC in DMSO at 80 °C and SEC in HFIP at 40 °C.

| [M]:[I] | <i>M<sub>n</sub></i> <sup>a</sup> / g mol <sup>-1</sup> | <i>D</i> <sup>a</sup> | <i>M<sub>n</sub></i> <sup>b</sup> / g mol <sup>-1</sup> | <i>D</i> <sup>b</sup> |
|---------|---------------------------------------------------------|-----------------------|---------------------------------------------------------|-----------------------|
| 30:1    | 23,400                                                  | 1.56                  | 25,000                                                  | 1.93                  |

<sup>a</sup> Determined by SEC in DMSO at 80 °C calibrated using PMMA standards. <sup>b</sup> Determined by SEC in HFIP at 40 °C calibrated using PMMA standards.

**Table S2.** α and K values calculated from Mark–Houwink–Sakurada (MHS) plots of PLGA25s synthesised at 150 °C for 2.5 hours using varying [M]:[I] ratios (30:1 to 30,000:1) and [M]:[C] = 6,500:1. Determined via SEC in DMSO at 80 °C.

| [M]:[I]  | α    | K × 10 <sup>5</sup> / dL g <sup>-1</sup> |
|----------|------|------------------------------------------|
| 30:1     | 0.37 | 376                                      |
| 300:1    | 0.57 | 101                                      |
| 3,000:1  | 0.59 | 82                                       |
| 30,000:1 | 0.55 | 159                                      |

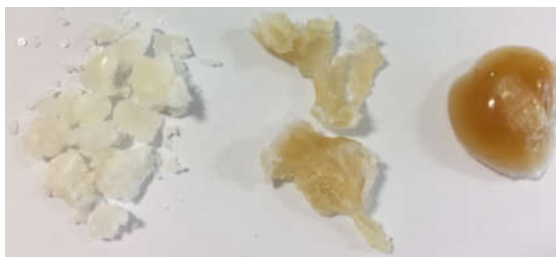

**Figure S2.** Appearances of PLGA25s synthesised at 150 °C for 2.5 hours using [M]:[C] of 6,500:1 and [M]:[I] of 30:1, 300:1 and 3,000:1.

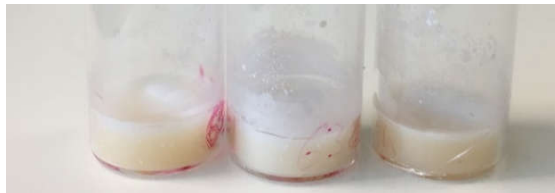

130 °C, 2 h, 4 h, 8 h

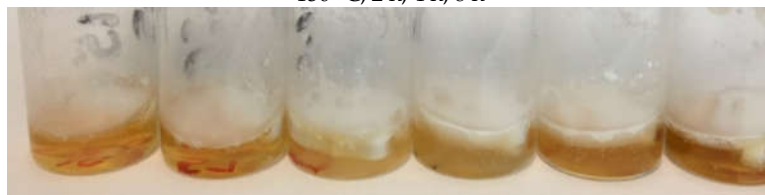

150 °C, 0.15 h, 0.3 h, 1 h, 2 h, 4 h, 8 h

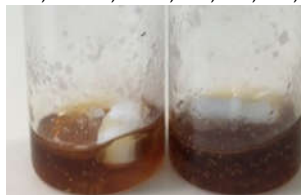

180 °C, 1 h, 2 h

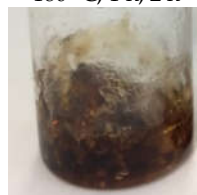

180-205 °C, 2 h

**Figure S3.** Appearances of PLGA25s synthesised using an [M]:[C] = 6,500:1 and [M]:[I] = 30,000:1 at 130-205 °C.

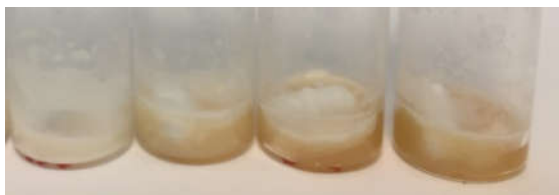

150 °C, 2 h, 4 h, 8 h, 16 h

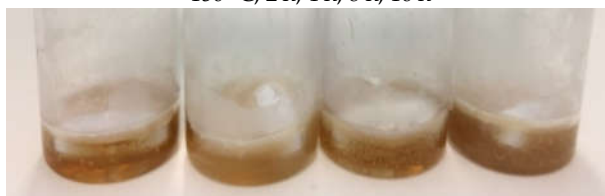

170 °C, 2 h, 4 h, 6 h, 8 h

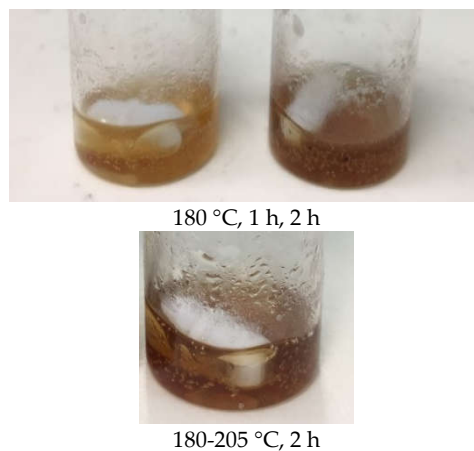

**Figure S4.** Appearances of PLGA25s synthesised using an  $[M]:[C] = 50,000:1$  and  $[M]:[I] = 30,000:1$  at 150-205 °C.

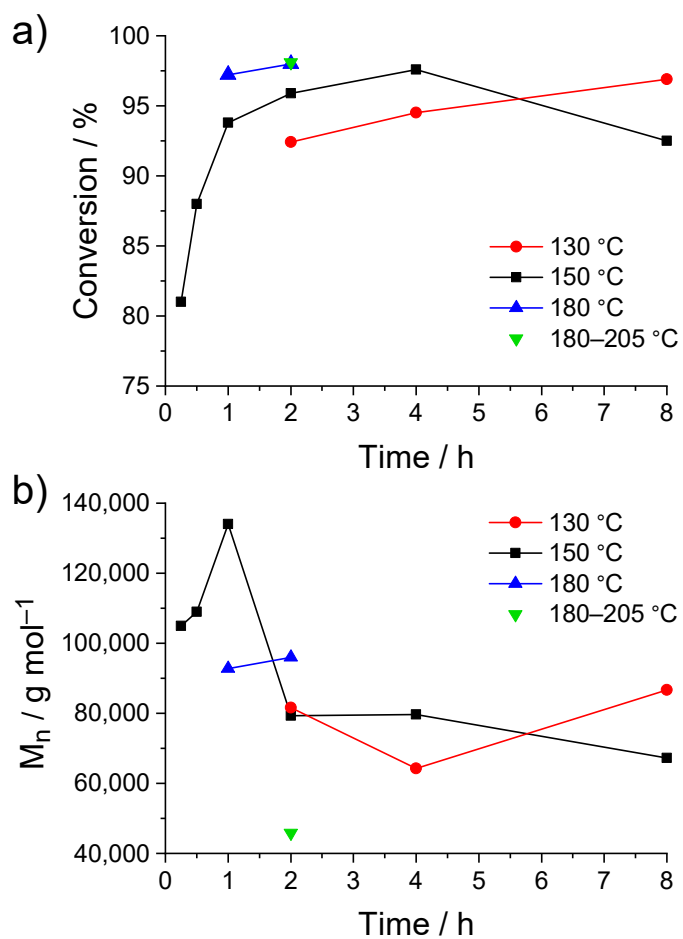

**Figure S5.** Graphs of a) Conversion vs Time and b)  $M_n$  vs Time for PLGA25 polymerisation reactions performed using an  $[M]:[C] = 6,500:1$  and  $[M]:[I] = 30,000:1$  at 130 °C, 150 °C, 180 °C and 180-205 °C.

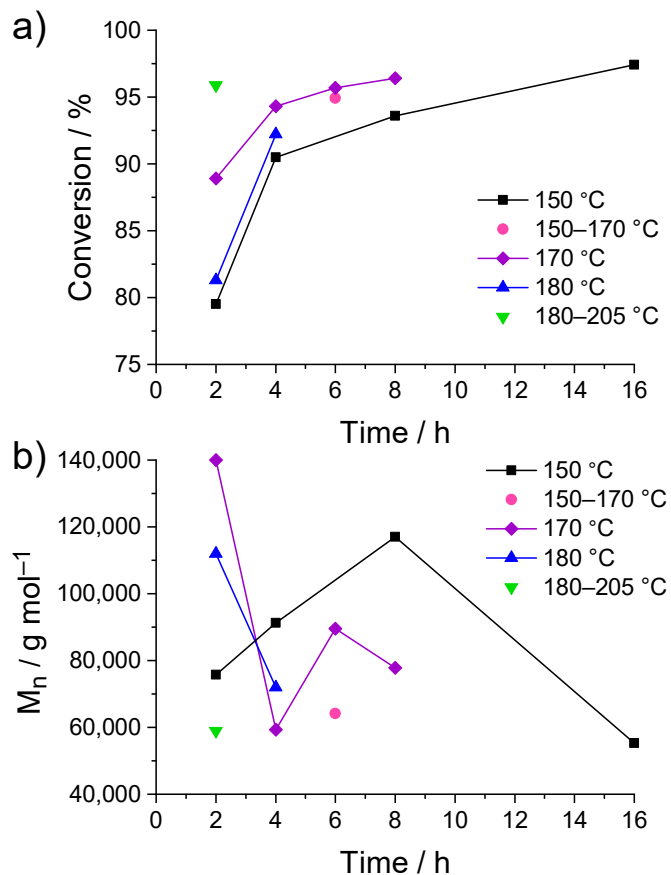

**Figure S6.** Graphs of a) Conversion vs Time and b)  $M_n$  vs Time for PLGA25 polymerisation reactions performed using an  $[M]:[C] = 50,000:1$  and  $[M]:[I] = 30,000:1$  at 150 °C, 150–170 °C, 170 °C, 180 °C and 180–205 °C.

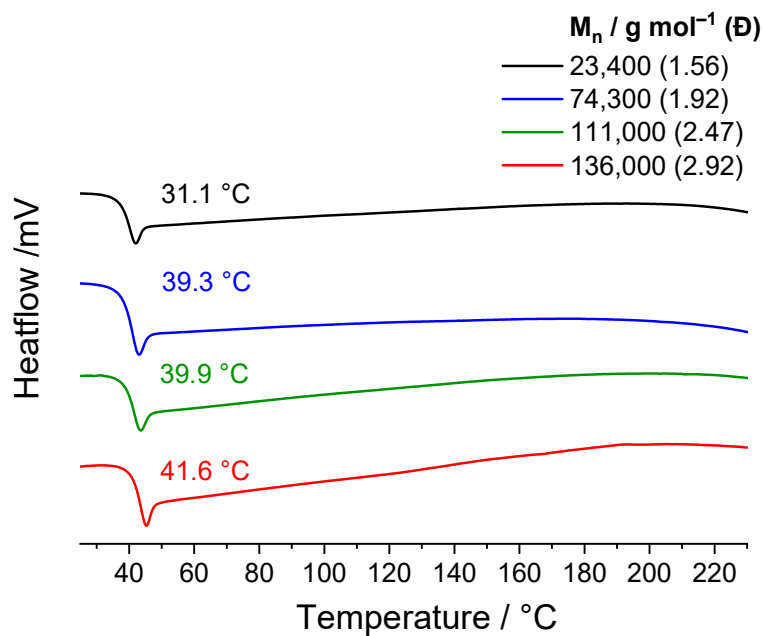

**Figure S7.** DSC thermograms of PLGA25 synthesised at 150 °C for 2.5 hours using an  $[M]:[C] = 6,500:1$  and  $[M]:[I] = 30:1$  to 30,000:1.

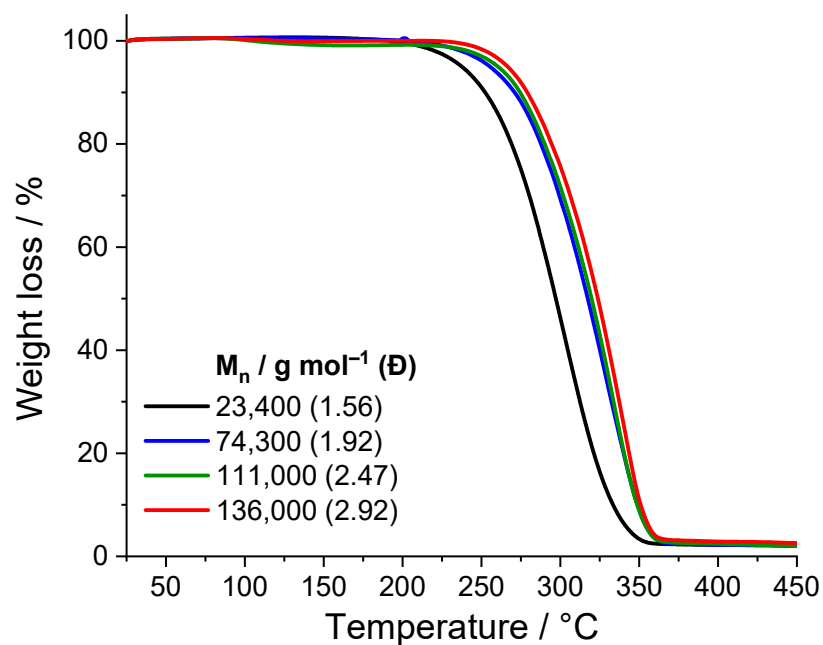

**Figure S8.** TGA thermograms of PLGA25 synthesised at 150 °C for 2.5 hours using an  $[M]:[C] = 6,500:1$  and  $[M]:[I] = 30:1$  to 30,000:1.

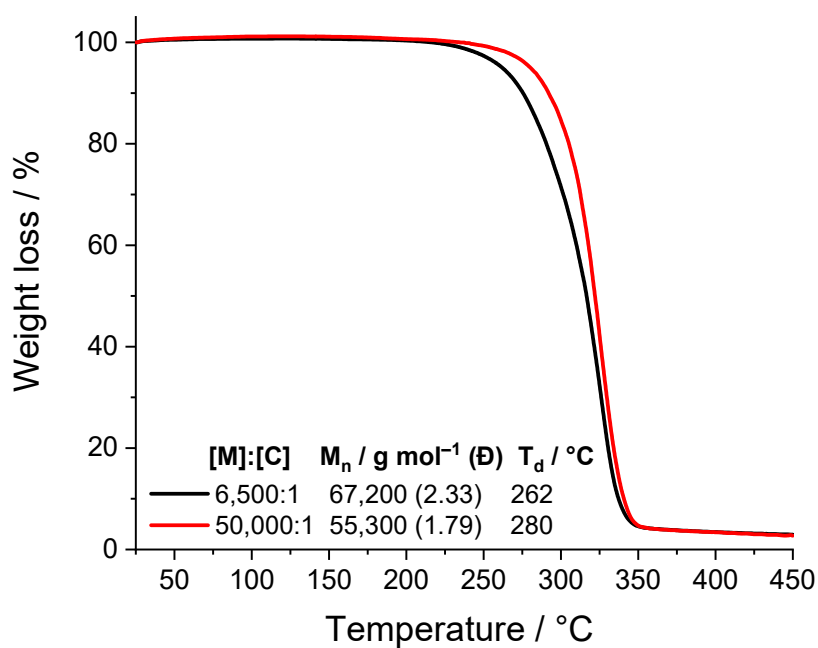

**Figure S9.** TGA thermograms of PLGA25 synthesised using different catalyst concentrations.  $[M]:[C] = 6,500:1$  and 50,000:1. Both samples were synthesised at 150 °C using an  $[M]:[I] = 30,000:1$ .
